# Supplementary material
Source: Springer Nature journal article supplement (https://www.springermedizin.de/resource/supplementary/12943_2009_565_MOESM11_ESM.pdf/9554982)

(A) Effect on mRNA levels

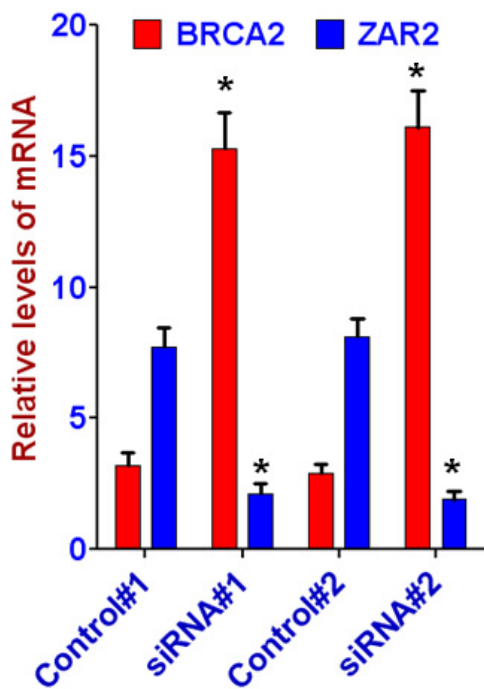

(B) Effect on promoter activities

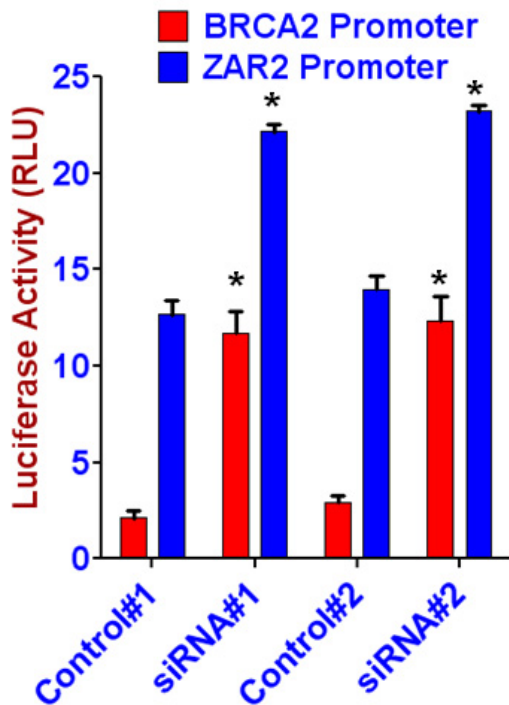

Supplement: MOESM11 [file 9554982]
